# Supplementary material
Source: PubMed Central journal article supplement (PMC7578706)
Supplement: MD-011-D0MD00054J-s001.pdf [file MD-011-D0MD00054J-s001.pdf]

# Synthesis and <sup>18</sup>F-radiolabeling of thymidine AMBF<sub>3</sub> conjugates

Antonio A. W. L. Wong,<sup>a</sup> Jerome Lozada,<sup>a</sup> Mathieu Lepage,<sup>a</sup> Helen Merkens,<sup>b</sup> Jutta Zeisler,<sup>b</sup> Chengcheng Zhang,<sup>b</sup> Kuo-Shyan Lin,<sup>b</sup> François Bérnard<sup>b</sup> and David M. Perrin<sup>a,†</sup>

<sup>a</sup> Department of Chemistry, University of British Columbia, 2036 Main Mall, Vancouver, BC, V6T 1Z1 Canada

<sup>b</sup> Department of Molecular Oncology, B.C. Cancer Research Centre, 675 West 10th Avenue, Vancouver, BC, V5Z 1L3 Canada

<sup>†</sup> To whom correspondence should address to Dr. David Perrin [dperrin@chem.ubc.ca](mailto:dperrin@chem.ubc.ca)

## Supplementary Information

### Table of contents

|                                                                                                                                                                                                                                                     |           |
|-----------------------------------------------------------------------------------------------------------------------------------------------------------------------------------------------------------------------------------------------------|-----------|
| <b>Supplementary Information</b> .....                                                                                                                                                                                                              | <b>1</b>  |
| <i>Supplemental Synthetic Schemes and NMR Spectra</i> .....                                                                                                                                                                                         | <b>2</b>  |
| 5-hydroxymethyl-2'-deoxyuridine .....                                                                                                                                                                                                               | 2         |
| 5-azidomethyl-2'-deoxyuridine, <b>5</b> .....                                                                                                                                                                                                       | 3         |
| N-((difluoroboranyl)methyl)-N,N-dimethylprop-2-yn-1-aminium fluoride, <b>4</b> .....                                                                                                                                                                | 4         |
| (((3-chloropropyl)dimethylammonio)methyl)trifluoroborate, <b>7</b> .....                                                                                                                                                                            | 7         |
| Trifluoro(((1-((1-((2R,4S,5R)-4-hydroxy-5-(hydroxymethyl)tetrahydrofuran-2-yl)-2,4-dioxo-1,2,3,4-tetrahydropyrimidin-5-yl)methyl)-1H-1,2,3-triazol-4-yl)methyl)dimethylammonio)methyl)borate, dT-C <sup>5</sup> -AMBF <sub>3</sub> , <b>1</b> ..... | 9         |
| Trifluoro(((3-(3-((2R,4S,5R)-4-hydroxy-5-(hydroxymethyl)tetrahydrofuran-2-yl)-5-methyl-2,6-dioxo-3,6-dihydropyrimidin-1(2H)-yl)propyl)dimethylammonio)methyl)borate, dT-N <sup>3</sup> -AMBF <sub>3</sub> , <b>2</b> .....                          | 11        |
| <i>Radiochemistry and Imaging</i> .....                                                                                                                                                                                                             | <b>14</b> |
| Radiosynthesis .....                                                                                                                                                                                                                                | 14        |
| PET/CT imaging and biodistribution studies .....                                                                                                                                                                                                    | 15        |
| logP <sub>7,4</sub> .....                                                                                                                                                                                                                           | 17        |

Supplemental Synthetic Schemes and NMR Spectra  
5-hydroxymethyl-2'-deoxyuridine  
Spectral data agrees with previous literature<sup>12</sup>.

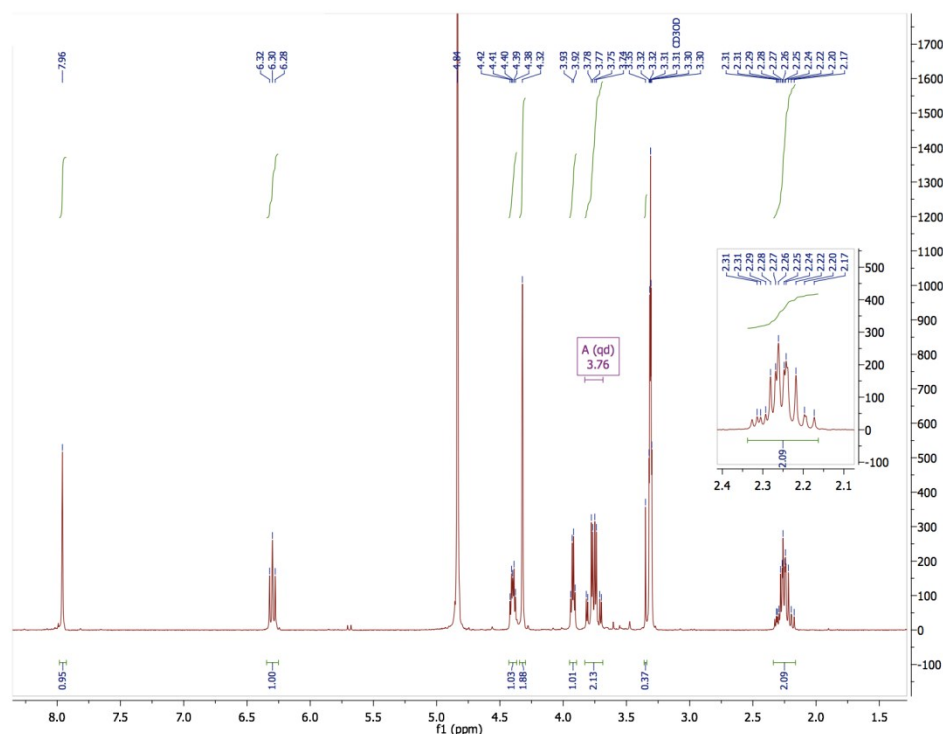

**Figure S1.** <sup>1</sup>H NMR (300 MHz) of 5-hydroxymethyl-2'-deoxyuridine.

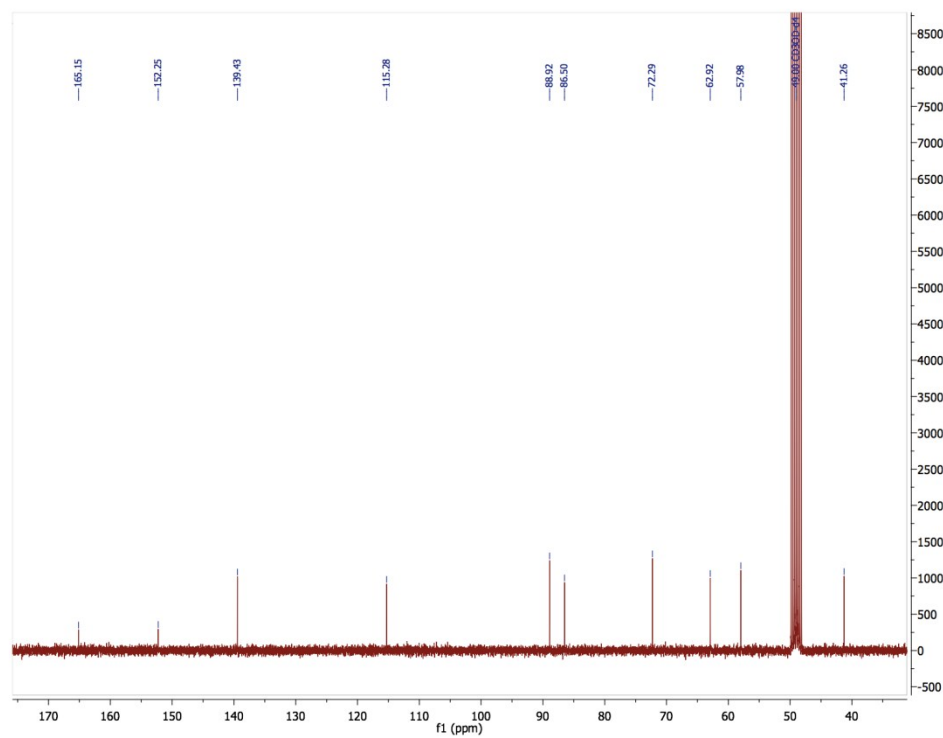

**Figure S2.**  $^{13}\text{C}$  NMR (75 MHz) of 5-hydroxymethyl-2'-deoxyuridine.

5-azidomethyl-2'-deoxyuridine, **5**  
Spectral data agrees with previous literature <sup>27</sup>.

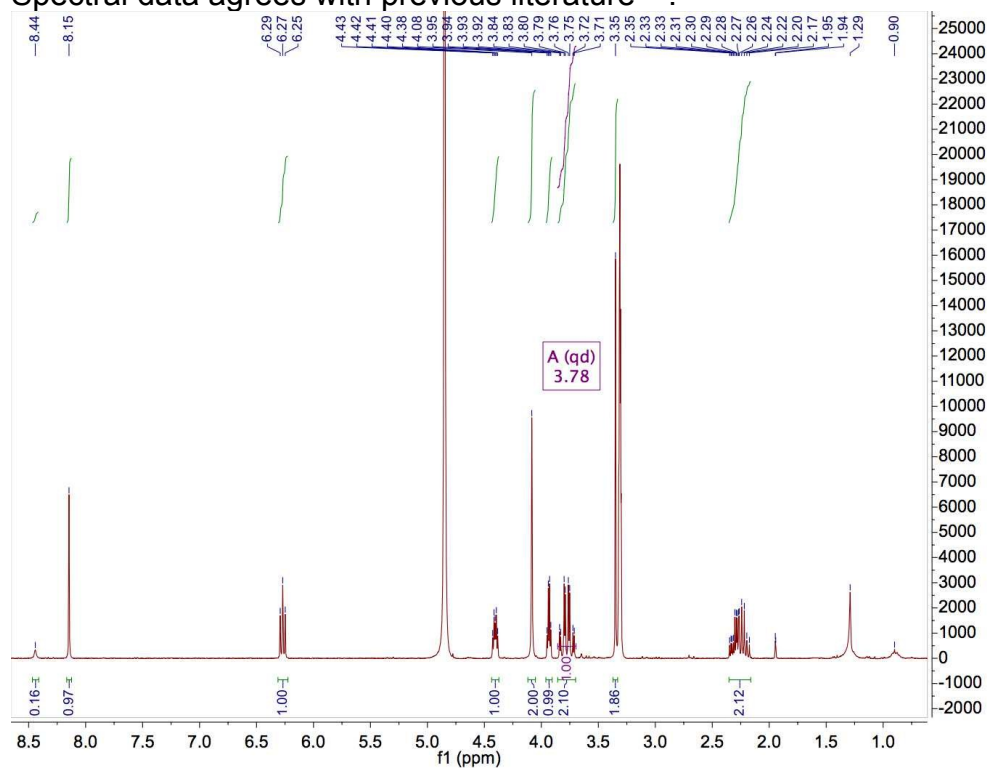

**Figure S3.**  $^1\text{H}$  NMR (300 MHz) of **5**.

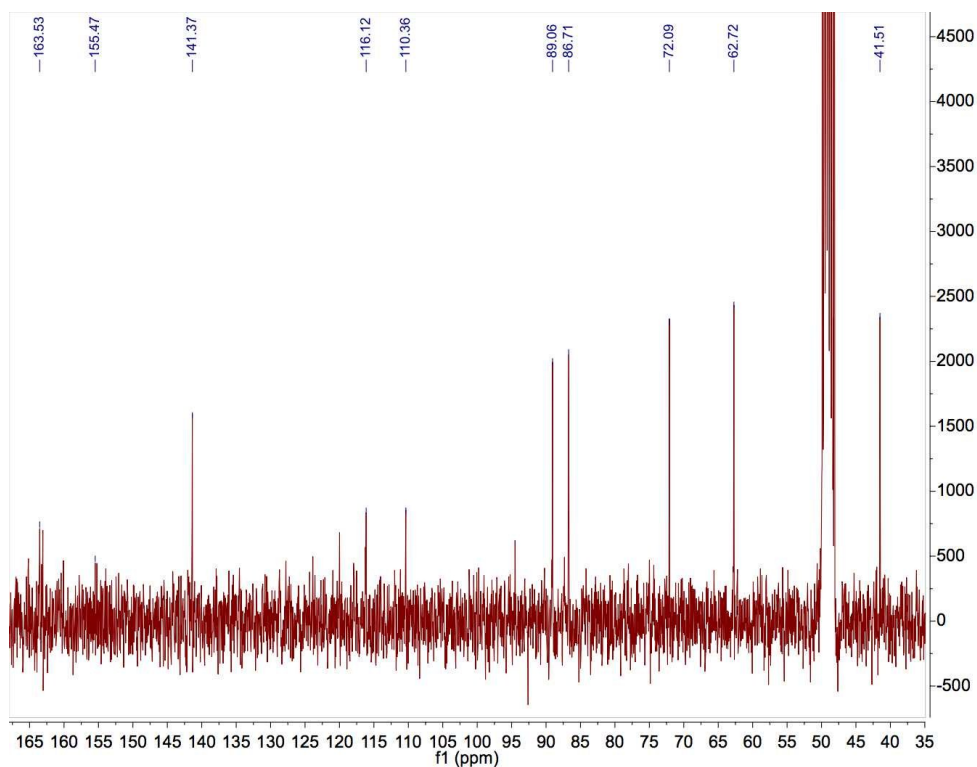

**Figure S4.**  $^{13}\text{C}$  NMR (75 MHz) of **5**.

N-((difluoroboraneyl)methyl)-N,N-dimethylprop-2-yn-1-aminium fluoride, **4**

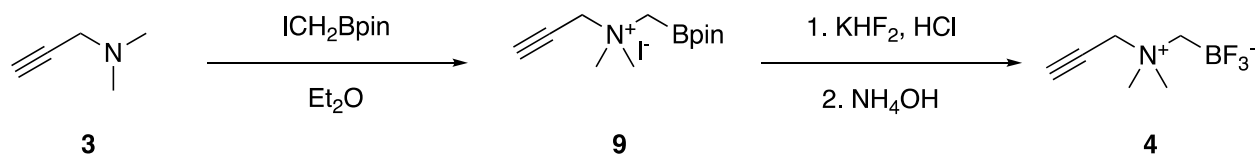

**Figure S5.** Synthesis of **4**.

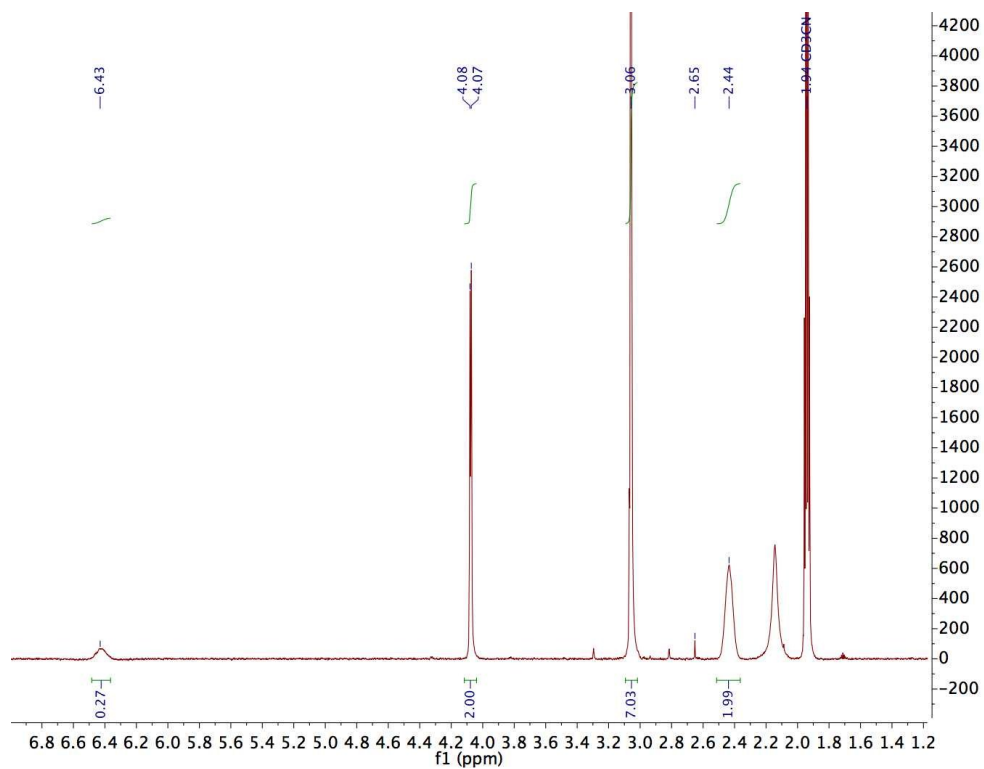

**Figure S6.**  $^1\text{H}$  NMR (300 MHz) of 4.

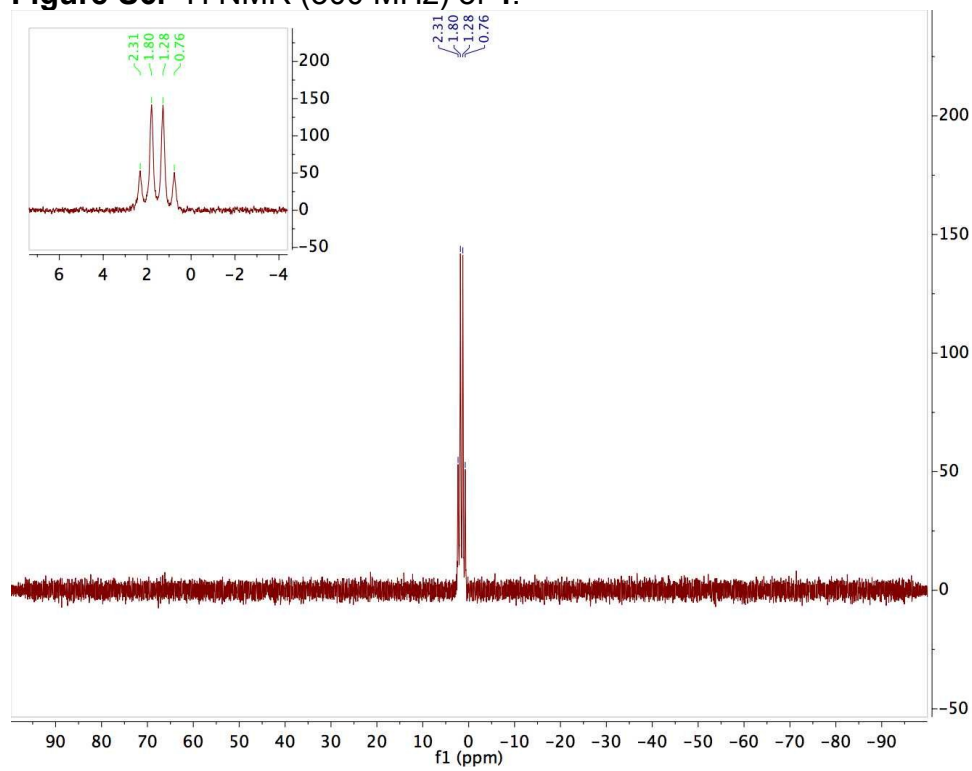

**Figure S7.**  $^{11}\text{B}$  NMR (96 MHz) of 4.

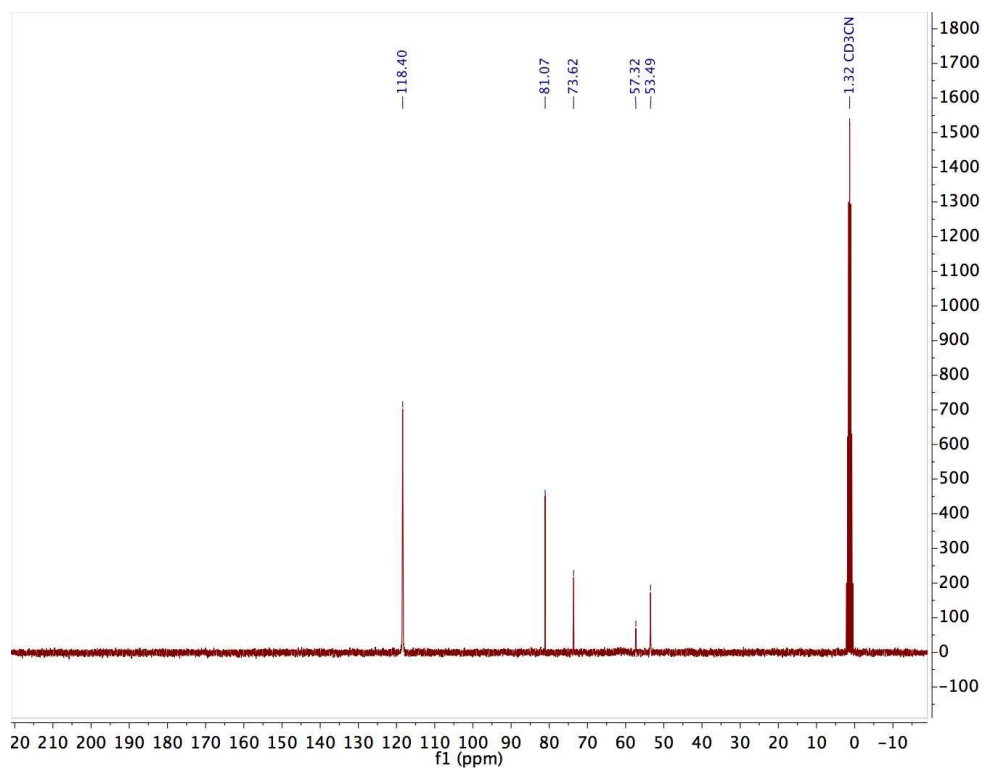

**Figure S8.**  $^{13}\text{C}$  NMR (75 MHz) of 4.

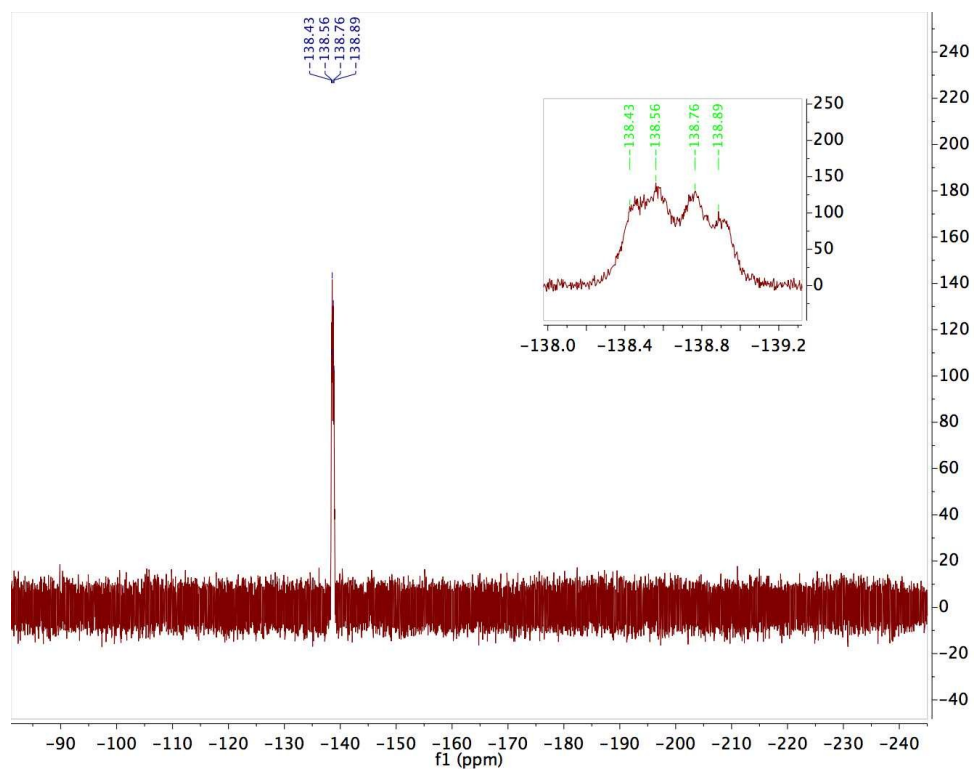

**Figure S9.**  $^{19}\text{F}$  NMR (282 MHz) of 4.

(((3-chloropropyl)dimethylammonio)methyl)trifluoroborate, **7**

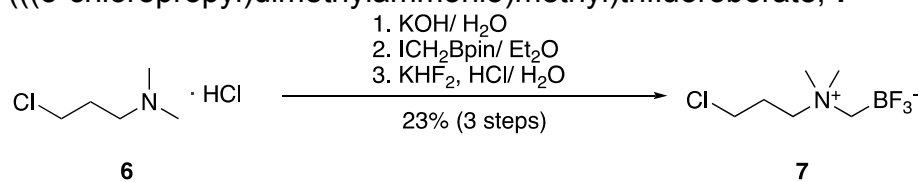

**Figure S10.** Synthesis of **7**.

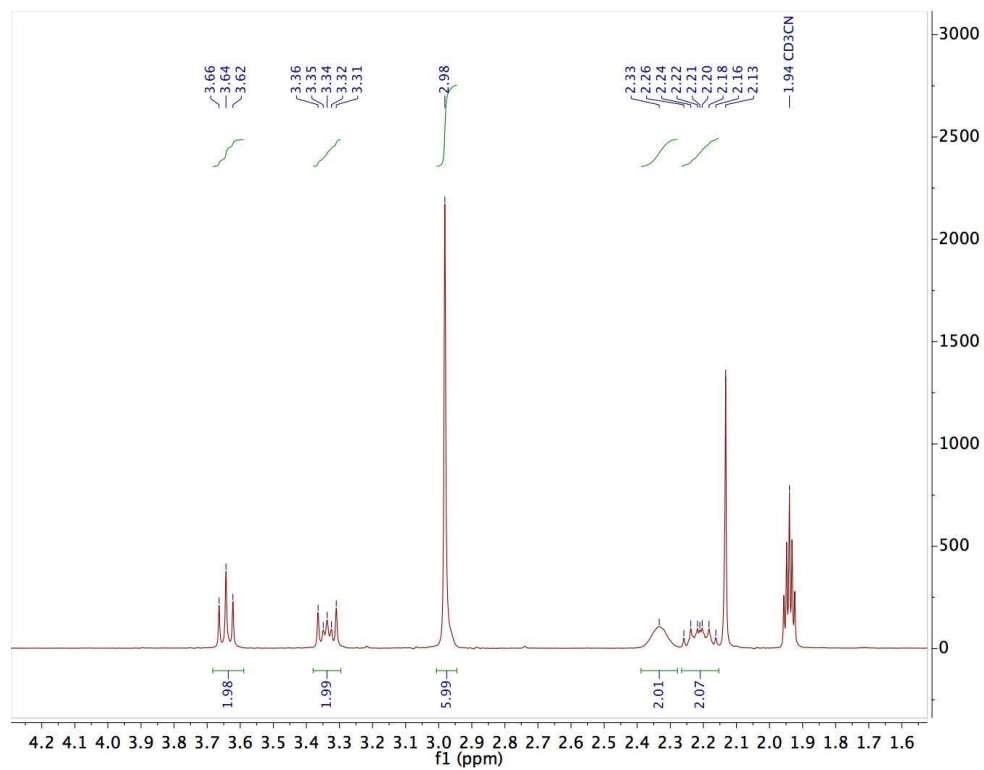

**Figure S11.** <sup>1</sup>H NMR (300 MHz) of **7**.

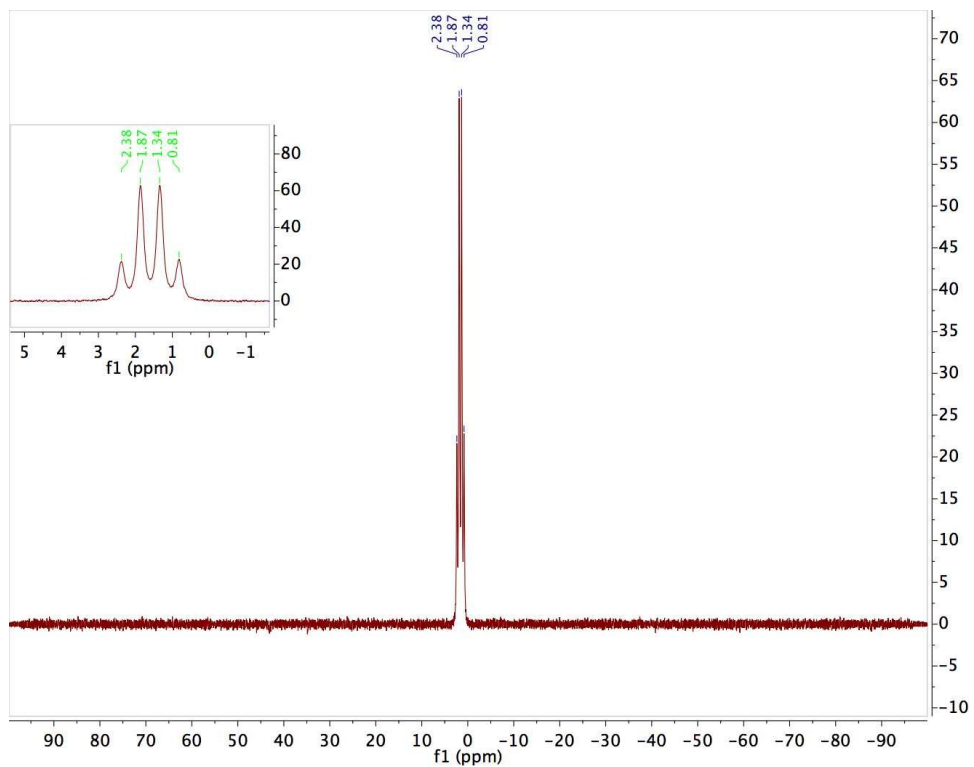

Figure S12.  $^{11}\text{B}$  NMR (96 MHz) of 7.

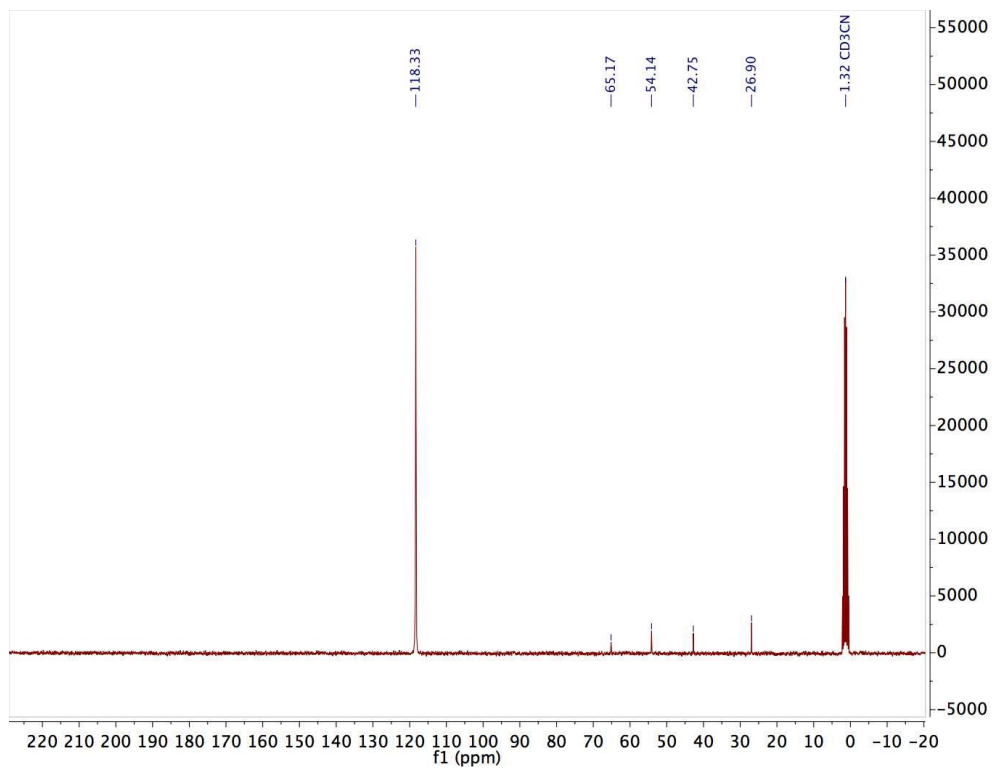

Figure S13.  $^{13}\text{C}$  NMR (75 MHz) of 7.



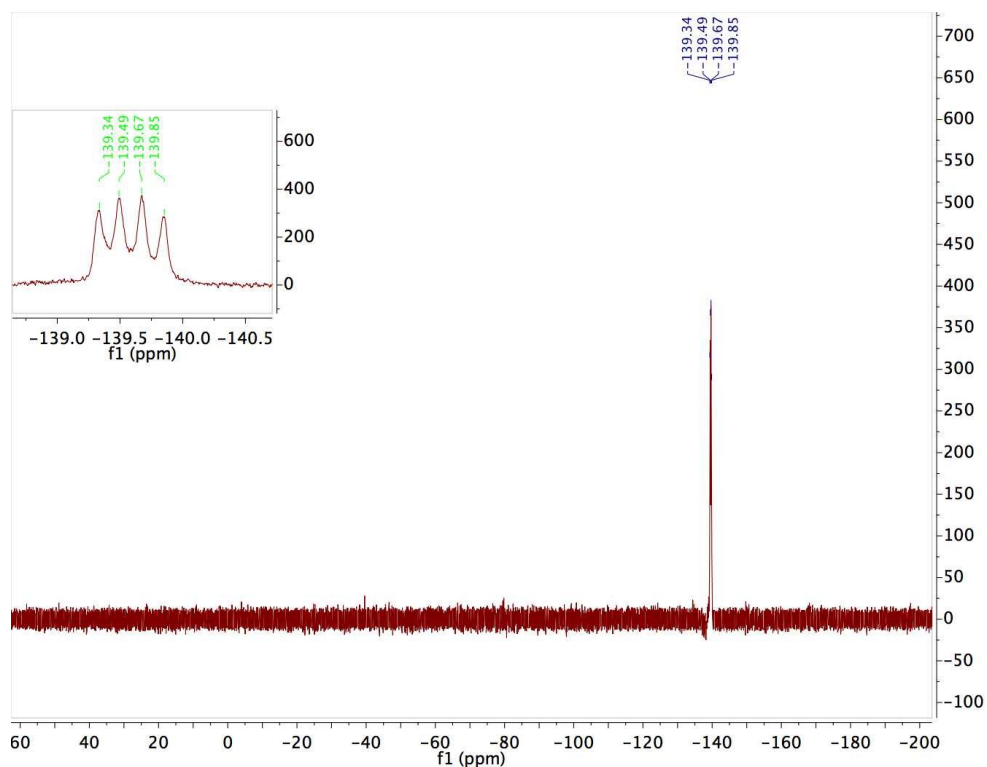

**Figure S14.**  $^{19}\text{F}$  NMR (282 MHz) of **7**.

Trifluoro(((1-(((1-((2R,4S,5R)-4-hydroxy-5-(hydroxymethyl)tetrahydrofuran-2-yl)-2,4-dioxo-1,2,3,4-tetrahydropyrimidin-5-yl)methyl)-1H-1,2,3-triazol-4-yl)methyl)dimethylammonio)methyl)borate, dT-C<sup>5</sup>-AMBF<sub>3</sub>, **1**

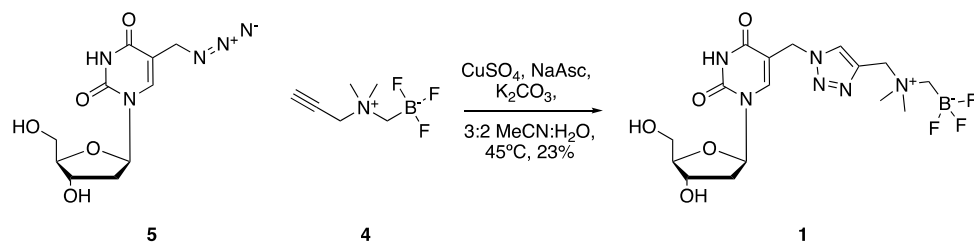

**Figure S15.** Synthesis of **1**.

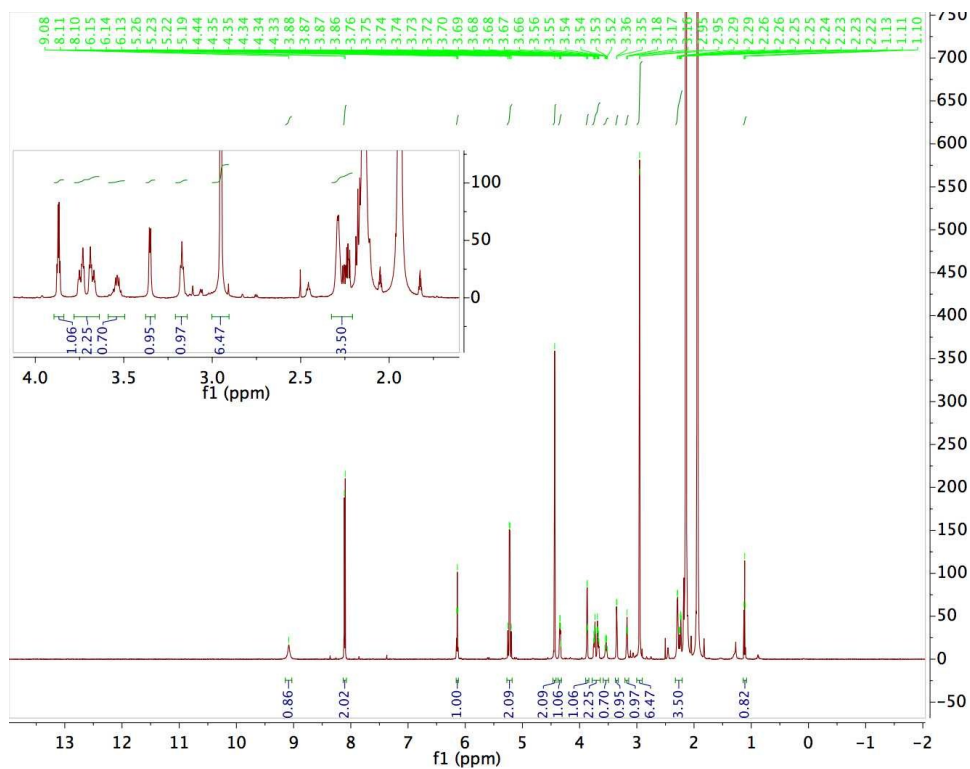

Figure S16.  $^1\text{H}$  NMR (600 MHz) of **1**.

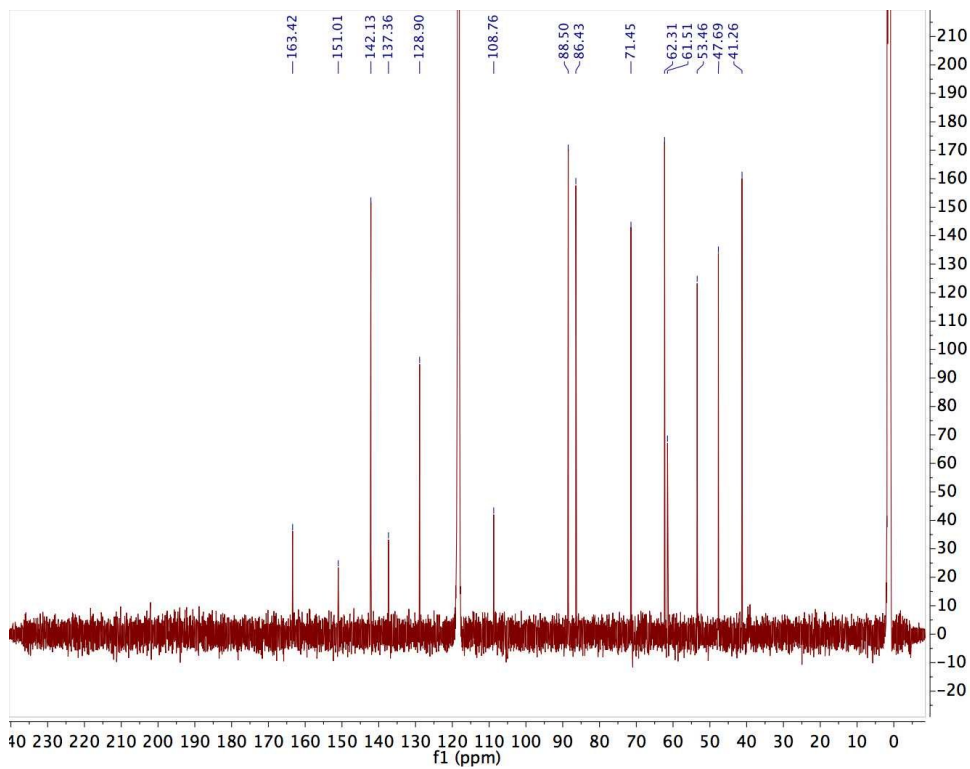

Figure S17.  $^{13}\text{C}$  NMR (150 MHz) of **1**.

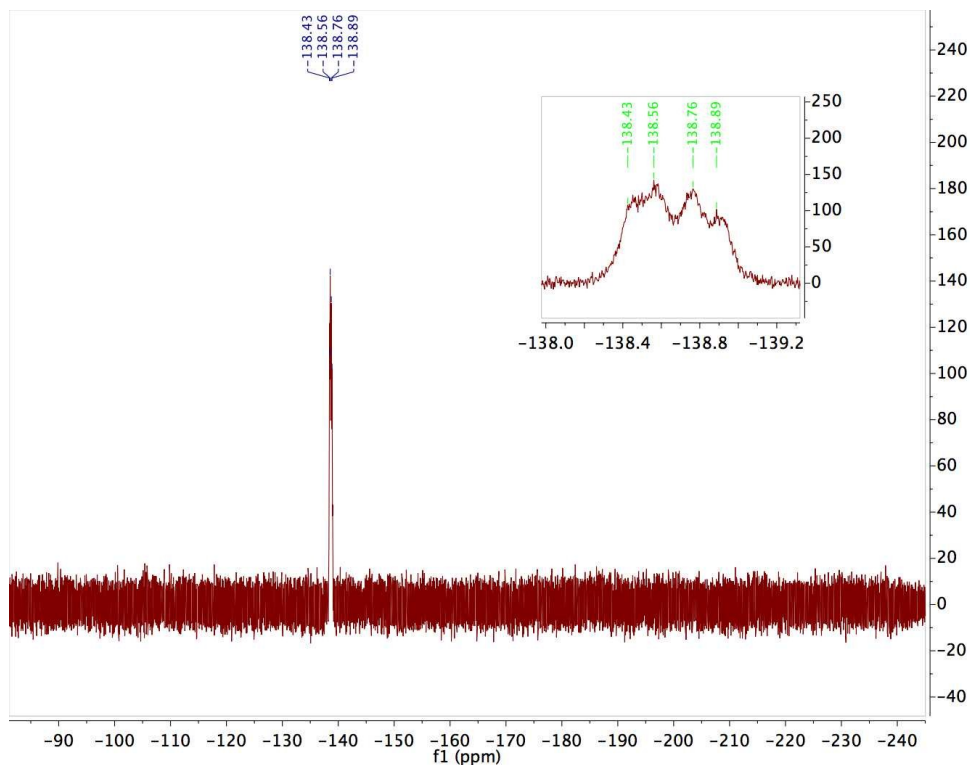

**Figure S18.**  $^{19}\text{F}$  NMR (282 MHz) of **1**.

Trifluoro(((3-(3-((2R,4S,5R)-4-hydroxy-5-(hydroxymethyl)tetrahydrofuran-2-yl)-5-methyl-2,6-dioxo-3,6-dihydropyrimidin-1(2H)-yl)propyl)dimethylammonio)methyl)borate, dT-N<sup>3</sup>-AMBF<sub>3</sub>, **2**

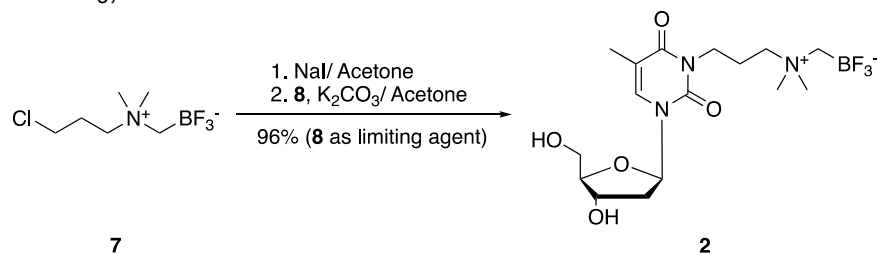

**Figure S19.** Synthesis of **2**.

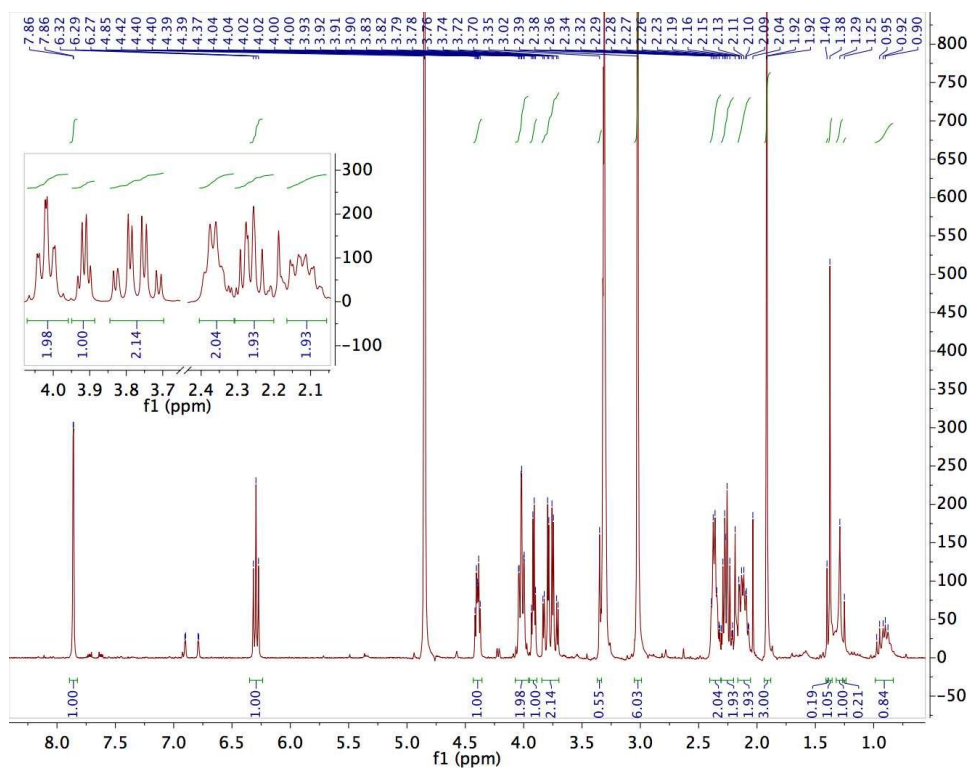

Figure S20.  $^1\text{H}$  NMR (300 MHz) of **2**.

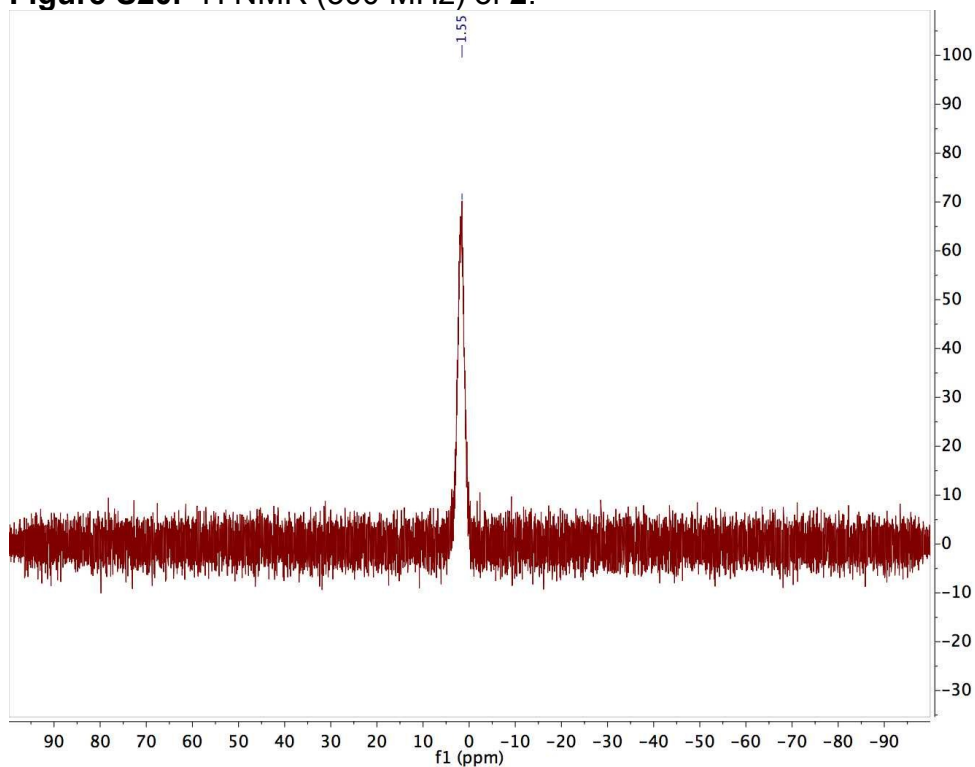

Figure S21.  $^{11}\text{B}$  NMR (96 MHz) of **2**.

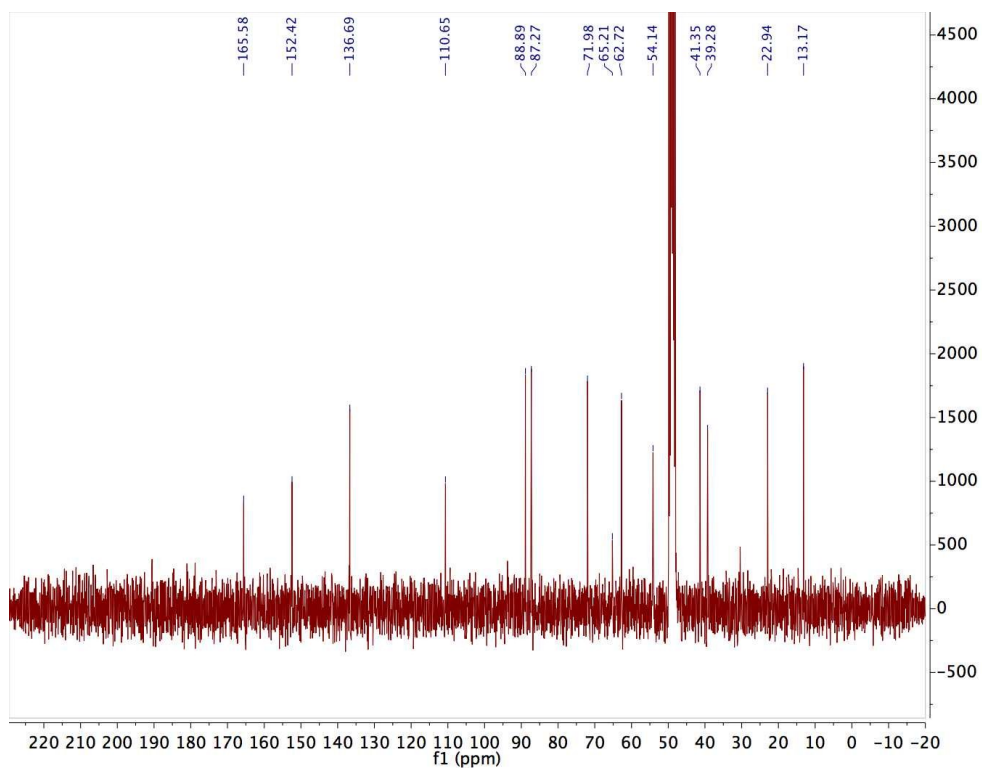

**Figure S22.**  $^{13}\text{C}$  NMR (75 MHz) of **2**.

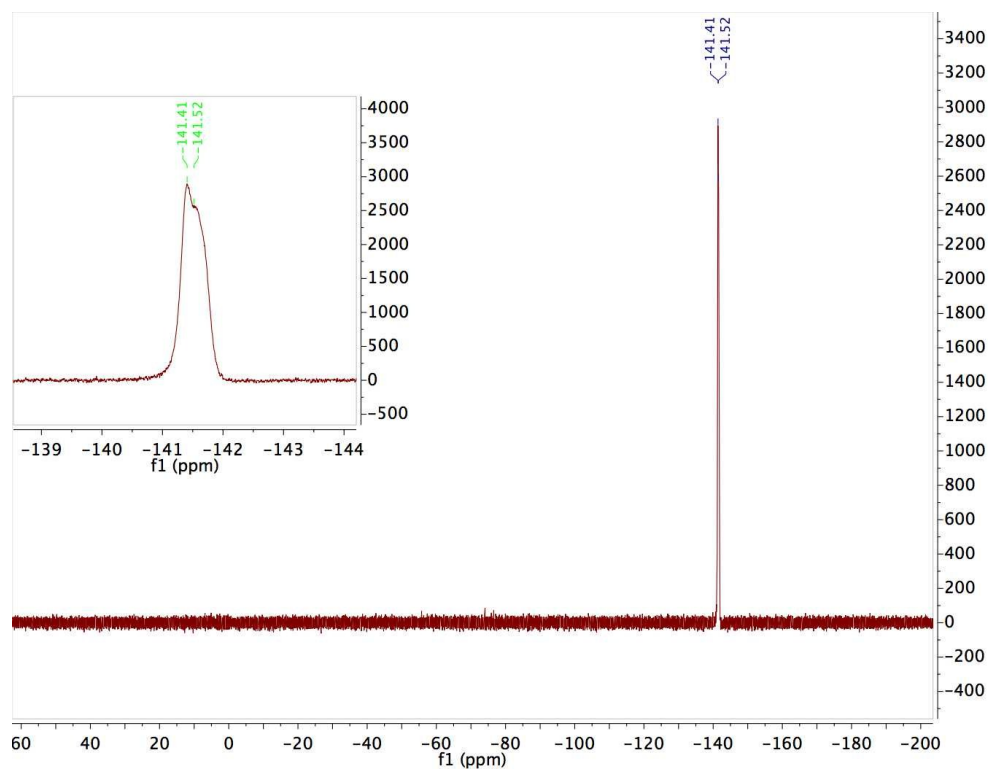

**Figure S23.**  $^{19}\text{F}$  NMR (282 MHz) of **2**.

## Radiochemistry and Imaging

### Radiosynthesis

Lot numbers of [ $^{18}\text{O}$ ]- $\text{H}_2\text{O}$  used for [ $^{18}\text{F}$ ]-fluoride generation were 18-0539, 18-0757, 19-0097, 19-0149 and 19-0285 in British Columbia Cancer Research Centre.

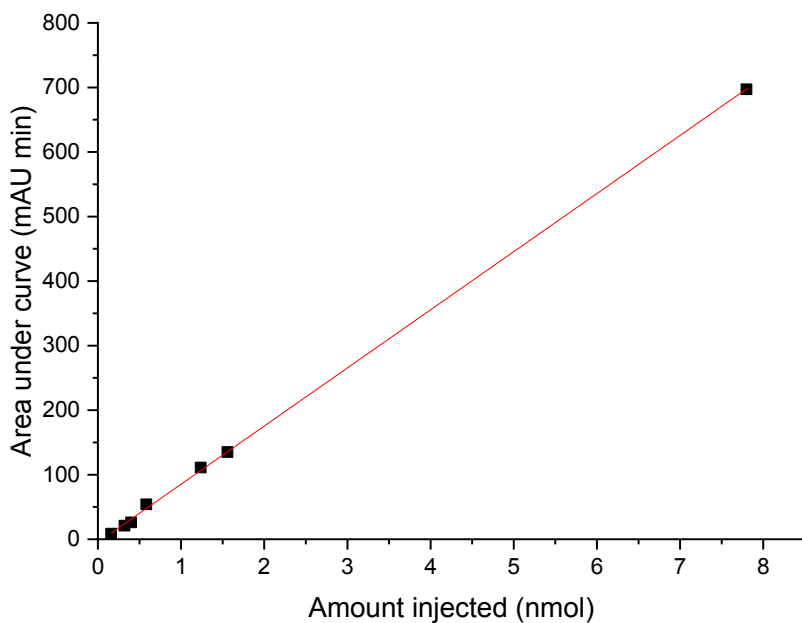

**Figure S24.** Standard curve for [ $^{18}\text{F}$ ]**1**.  $y = 90.1x - 4.76$ ,  $R^2 = 0.9997$ .

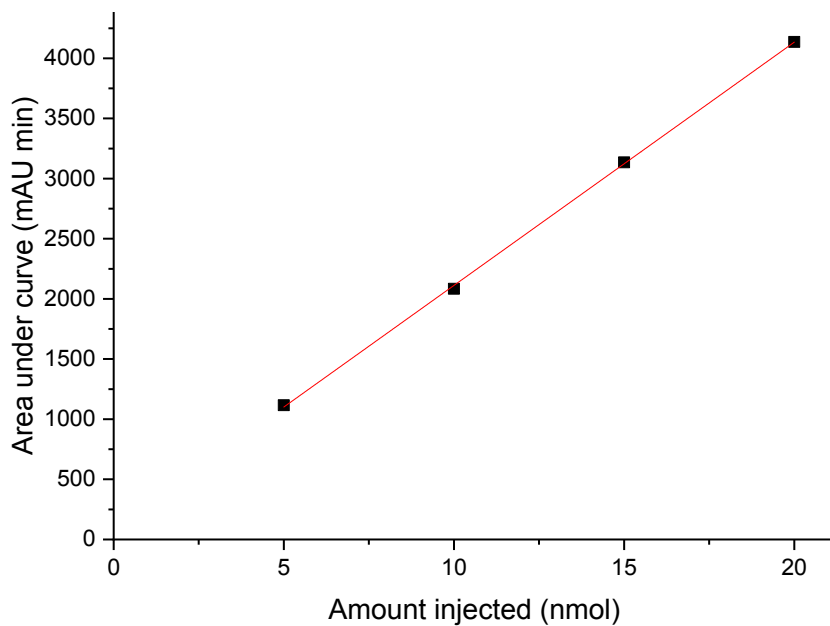

**Figure S25.** Standard curve for [ $^{18}\text{F}$ ]**2**.  $y = 202x - 90.2$ ,  $R^2 = 0.9997$ .

PET/CT imaging and biodistribution studies

**Table S1.** Biodistribution of [<sup>18</sup>F]1 in NSG mice bearing U87 tumor.

| 1h p.i.      | Subject 1 | Subject 2 | Subject 3 | Mean (%ID/g) | Standard deviation |
|--------------|-----------|-----------|-----------|--------------|--------------------|
| Tumor/bone   | 1.57      | 2.77      | 1.73      | 2.02         | 0.65               |
| Tumor/muscle | 4.57      | 4.72      | 3.10      | 4.13         | 0.90               |
| Tumor/blood  | 1.23      | 1.16      | 0.93      | 1.11         | 0.16               |
| Tumor/kidney | 0.33      | 0.30      | 0.26      | 0.30         | 0.04               |

**Table S2.** Imaging data of [<sup>18</sup>F]1 in NSG mice bearing U87 tumor.

| 1h p.i.   | Subject 1 | Subject 2 | Subject 3 | Mean (%ID/g) | Standard deviation |
|-----------|-----------|-----------|-----------|--------------|--------------------|
| Blood     | 0.07      | 0.14      | 0.07      | 0.09         | 0.04               |
| Urine     | 53.49     | 70.23     | 119.60    | 81.11        | 34.37              |
| Fat       | 0.01      | 0.01      | 0.01      | 0.01         | 0.00               |
| Intestine | 0.47      | 0.48      | 0.37      | 0.44         | 0.06               |
| Spleen    | 0.02      | 0.02      | 0.01      | 0.02         | 0.01               |
| Pancreas  | 0.03      | 0.06      | 0.02      | 0.04         | 0.02               |
| Liver     | 0.37      | 0.51      | 0.14      | 0.34         | 0.19               |
| Kidney    | 0.26      | 0.52      | 0.25      | 0.35         | 0.15               |
| Heart     | 0.02      | 0.04      | 0.01      | 0.03         | 0.01               |
| Lungs     | 0.06      | 0.11      | 0.04      | 0.07         | 0.03               |
| U87 Tumor | 0.09      | 0.16      | 0.07      | 0.10         | 0.05               |
| Bone      | 0.06      | 0.06      | 0.04      | 0.05         | 0.01               |
| Muscle    | 0.02      | 0.03      | 0.02      | 0.02         | 0.01               |
| Brain     | 0.00      | 0.01      | 0.00      | 0.00         | 0.00               |
| Tail      | 0.25      | 0.26      | 0.10      | 0.21         | 0.09               |

**Table S3.** Biodistribution of [<sup>18</sup>F]1 in unblocked NSG mice bearing U87 tumor.

| 1h p.i.      | Subject 4 | Subject 5 | Subject 6 | Subject 7 | Mean (%ID/g) | Standard deviation |
|--------------|-----------|-----------|-----------|-----------|--------------|--------------------|
| Tumor:bone   | 0.66      | 0.71      | 2.19      | 0.66      | 1.05         | 0.76               |
| Tumor:muscle | 2.97      | 1.18      | 7.58      | 1.07      | 3.20         | 3.05               |
| Tumor:blood  | 0.96      | 0.19      | 2.03      | 1.29      | 1.12         | 0.77               |
| Tumor:kidney | 0.18      | 0.25      | 0.34      | 0.22      | 0.24         | 0.07               |

**Table S4.** Imaging data of [<sup>18</sup>F]1 in unblocked NSG mice bearing U87 tumor.

| 1h p.i.   | Subject 4 | Subject 5 | Subject 6 | Subject 7 | Mean (%ID/g) | Standard deviation |
|-----------|-----------|-----------|-----------|-----------|--------------|--------------------|
| Blood     | 0.06      | 0.32      | 0.06      | 0.05      | 0.13         | 0.13               |
| Urine     | 397.79    | 269.12    | 270.64    | 176.45    | 278.50       | 90.91              |
| Fat       | 0.11      | 0.01      | 0.00      | 0.01      | 0.03         | 0.05               |
| Intestine | 0.39      | 0.49      | 0.51      | 0.55      | 0.48         | 0.07               |
| Spleen    | 0.02      | 0.04      | 0.03      | 0.03      | 0.03         | 0.01               |
| Pancreas  | 0.03      | 0.03      | 0.02      | 0.03      | 0.03         | 0.01               |
| Liver     | 0.21      | 0.33      | 0.30      | 0.37      | 0.30         | 0.07               |
| Kidney    | 0.35      | 0.24      | 0.39      | 0.32      | 0.33         | 0.06               |
| Heart     | 0.03      | 0.03      | 0.02      | 0.02      | 0.02         | 0.01               |
| Lungs     | 0.06      | 0.07      | 0.06      | 0.06      | 0.06         | 0.00               |
| U87 Tumor | 0.06      | 0.06      | 0.13      | 0.07      | 0.08         | 0.03               |
| Bone      | 0.09      | 0.09      | 0.06      | 0.11      | 0.09         | 0.02               |
| Muscle    | 0.02      | 0.05      | 0.02      | 0.07      | 0.04         | 0.02               |
| Brain     | 0.00      | 0.01      | 0.00      | 0.00      | 0.00         | 0.00               |
| Tail      | 0.18      | 0.34      | 0.24      | 0.11      | 0.22         | 0.09               |

**Table S5.** Biodistribution of [<sup>18</sup>F]1 in blocked NSG mice bearing U87 tumor.

| 1h p.i.      | Subject 8 | Subject 9 | Subject 10 | Subject 11 | Mean (%ID/g) | Standard deviation |
|--------------|-----------|-----------|------------|------------|--------------|--------------------|
| Tumor:bone   | 2.01      | 0.23      | 1.35       | 0.62       | 1.05         | 0.79               |
| Tumor:muscle | 3.27      | 2.93      | 3.05       | 2.50       | 2.94         | 0.33               |
| Tumor:blood  | 0.77      | 0.71      | 0.83       | 0.83       | 0.78         | 0.06               |
| Tumor:kidney | 0.17      | 0.15      | 0.26       | 0.29       | 0.22         | 0.07               |

**Table S6.** Imaging data of [<sup>18</sup>F]1 in blocked NSG mice bearing U87 tumor.

| 1h p.i.   | Subject 8 | Subject 9 | Subject 10 | Subject 11 | Mean (%ID/g) | Standard deviation |
|-----------|-----------|-----------|------------|------------|--------------|--------------------|
| Blood     | 0.21      | 0.05      | 0.30       | 0.10       | 0.17         | 0.11               |
| Urine     | 268.64    | 282.13    | 252.92     | 240.07     | 260.94       | 18.33              |
| Fat       | 0.01      | 0.01      | 0.03       | 0.01       | 0.01         | 0.01               |
| Intestine | 0.51      | 0.47      | 0.61       | 0.67       | 0.57         | 0.09               |
| Spleen    | 0.07      | 0.02      | 0.12       | 0.04       | 0.06         | 0.04               |
| Pancreas  | 0.07      | 0.02      | 0.09       | 0.06       | 0.06         | 0.03               |
| Liver     | 0.57      | 0.27      | 1.11       | 0.67       | 0.66         | 0.35               |
| Kidney    | 0.99      | 0.21      | 0.95       | 0.29       | 0.61         | 0.42               |
| Heart     | 0.07      | 0.02      | 0.09       | 0.04       | 0.05         | 0.03               |
| Lungs     | 0.18      | 0.05      | 0.22       | 0.08       | 0.13         | 0.08               |
| U87 Tumor | 0.17      | 0.03      | 0.25       | 0.08       | 0.13         | 0.09               |
| Bone      | 0.08      | 0.14      | 0.18       | 0.14       | 0.14         | 0.04               |
| Muscle    | 0.05      | 0.01      | 0.08       | 0.03       | 0.04         | 0.03               |
| Brain     | 0.01      | 0.00      | 0.01       | 0.01       | 0.01         | 0.00               |

**Table S7.** Biodistribution of [<sup>18</sup>F]2 in blocked NSG mice bearing U87 tumor.

| 1h p.i.      | Subject 12 | Subject 13 | Subject 14 | Mean (%ID/g) | Standard deviation |
|--------------|------------|------------|------------|--------------|--------------------|
| Tumor/bone   | 2.23       | 1.38       | 1.93       | 1.84         | 0.43               |
| Tumor/muscle | 3.84       | 3.44       | 4.01       | 3.76         | 0.29               |
| Tumor/blood  | 0.86       | 0.72       | 0.75       | 0.78         | 0.07               |
| Tumor/kidney | 0.27       | 0.15       | 0.15       | 0.19         | 0.07               |

**Table S8.** Imaging data of [<sup>18</sup>F]2 in blocked NSG mice bearing U87 tumor.

| 1h p.i.   | Subject 12 | Subject 13 | Subject 14 | Mean (%ID/g) | Standard deviation |
|-----------|------------|------------|------------|--------------|--------------------|
| Blood     | 0.11       | 0.10       | 0.14       | 0.11         | 0.02               |
| Urine     | 256.42     | 177.58     | 54.19      | 162.73       | 101.93             |
| Fat       | 0.01       | 0.00       | 0.01       | 0.01         | 0.01               |
| Intestine | 1.45       | 1.78       | 1.62       | 1.62         | 0.17               |
| Spleen    | 0.07       | 0.07       | 0.09       | 0.08         | 0.02               |
| Pancreas  | 0.05       | 0.05       | 0.07       | 0.06         | 0.01               |
| Liver     | 1.32       | 1.54       | 2.17       | 1.68         | 0.44               |
| Kidney    | 0.35       | 0.48       | 0.70       | 0.51         | 0.18               |
| Heart     | 0.04       | 0.04       | 0.05       | 0.04         | 0.01               |
| Lungs     | 0.09       | 0.08       | 0.12       | 0.10         | 0.02               |
| U87 Tumor | 0.09       | 0.07       | 0.10       | 0.09         | 0.02               |
| Bone      | 0.04       | 0.05       | 0.05       | 0.05         | 0.01               |
| Muscle    | 0.02       | 0.02       | 0.03       | 0.02         | 0.00               |
| Brain     | 0.01       | 0.00       | 0.00       | 0.00         | 0.00               |
| Tail      | 0.10       | 0.19       | 0.10       | 0.13         | 0.05               |



$\log P_{7.4}$

**Table S9.**  $\log P_{7.4}$  study of [ $^{18}\text{F}$ ]1. All activities are corrected to the time of quench.

|                                              | Volume ( $\mu\text{L}$ ) | Sample 1  | Sample 2  | Sample 3  |
|----------------------------------------------|--------------------------|-----------|-----------|-----------|
| Radioactivity, <i>n</i> -octanol layer (cpm) | 2000                     | 28741     | 30570     | 30634     |
| Radioactivity, PBS layer (cpm)               | 50                       | 789897    | 815208    | 703487    |
| $P_{7.4}$ , volume adjusted                  |                          | 0.0009096 | 0.0009375 | 0.0010886 |
| $\log P_{7.4}$                               |                          | -3.041    | -3.028    | -2.963    |

**Table S10.**  $\log P_{7.4}$  study of [ $^{18}\text{F}$ ]2. All activities are corrected to the time of quench.

|                                              | Volume ( $\mu\text{L}$ ) | Sample 1  | Sample 2  | Sample 3  |
|----------------------------------------------|--------------------------|-----------|-----------|-----------|
| Radioactivity, <i>n</i> -octanol layer (cpm) | 1000                     | 600       | 436       | 468       |
| Radioactivity, PBS layer (cpm)               | 100                      | 926664    | 967277    | 989905    |
| $P_{7.4}$ , volume adjusted                  |                          | 0.0000647 | 0.0000451 | 0.0000473 |
| $\log P_{7.4}$                               |                          | -4.189    | -4.346    | -4.325    |
